# Supplementary material for: The impact of river fragmentation on the population persistence of native and alien mink: an ecological trap for the endangered European mink
Source: Springer Nature journal article supplement (doi:10.1007/s10531-012-0410-3), 2012-12-01
Supplement: MOESM1 [file 5387086]

Supplementary materials:

Table 1. Detailed tracking periods, MEM stands for male European mink, MAM for male American mink, FEM for female European mink and FAM for female American mink. Locations shows the number of independent locations used to create the home-range estimation (capture point included). Animals marked with asterisk (*) are not considered in the analyses due to scarce radio-tracking data. Data of home range size of European mink were published by Garin et al. (2002b) (except individuals MEM7, FEM4, MEM8, MEM9) and for American mink by Zabala et al. (2007b).

| Individual | Basin | Tracking period | Number of independent locations | Home range length (m) | Tributary length (m) | Percentage of home range in tributaries |
| --- | --- | --- | --- | --- | --- | --- |
| MEM1 | Urdaibai | Mar. - May 1999 | 30 | 11100 | 8600 | 77.48 |
| MEM2 | Urdaibai | Feb. – Apr. 1999 | 39 | 11800 | 5300 | 44.91 |
| MEM3 | Urdaibai | Feb. – Oct. 1999 | 87 | 11200 | 7500 | 66.96 |
| MEM5 | Urdaibai | Mar. – Aug. 1999 | 52 | 16800 | 5620 | 50.18 |
| MEM6 | Urdaibai | Sep. 1999 – Feb. 2000 | 71 | 12700 | 6200 | 48.82 |
| MEM7* | Butrón | Nov. – Dec. 2004 | 5 | 5938 | 2509 | 42.20 |
| MEM8 | Kadagua | Dec. 2004 – Feb. 2005 | 22 | 10774 | 0 | 0 |
| MEM9 | Kadagua | Dec. 2004 – Apr. 2005 | 32 | 17532 | 1405 | 8 |
| FEM1 | Urdaibai | Mar. – May 1999 | 27 | 3600 | 3600 | 100 |
| FEM3 | Urdaibai | Jan. – Mar. 2000 | 24 | 600 | 300 | 50 |
| FEM4 | Butrón | Nov. – Dec. 2004 | 7 | 5990 | 1450 | 24.2 |
| MAM1* | Butrón | Nov.- Dec. 2004 | 6 | 2237 | 0 | 0 |
| MAM2 | Butrón | Nov. 2004 - Feb. 2005 | 32 | 4085 | 391 | 9.3 |
| MAM3* | Butrón | Nov. - Dec. 2004 | 4 | 1017 | 36 | 3.5 |
| MAM4 | Butrón | Nov. 2004 - Jan. 2005 | 19 | 1193 | 123 | 9.6 |
| MAM5 | Butrón | Jan. - Apr. 2005 | 26 | 15874 | 10167 | 64.1 |
| FAM1 | Butrón | Nov. 2004 - Feb. 2005 | 28 | 10486 | 5156 | 49.2 |
| FAM2* | Butrón | Nov. - Dec. 2004 | 3 | 332 | 55 | 83.4 |
| FAM3 | Butrón | Jan.- Apr. 2005 | 30 | 2099 | 1539 | 73.3 |
| FAM4 | Butrón | 14 Jan. 2007 Apr. 2005 | 26 | 4063 | 2300 | 56.6 |
| FAM5 | Butrón | Jan. - Apr. 2005 | 27 | 3051 | 1111 | 36.4 |
